# Supplementary material for: Dimensionality Controls Anion Intermixing in Electroluminescent Perovskite Heterojunctions
Source: PubMed Central journal article supplement (PMC9305999; doi:10.1021/acsphotonics.2c00604), 2022-07-07
Supplement: ph2c00604_si_001.pdf [file ph2c00604_si_001.pdf]

# Dimensionality Controls Anion Intermixing in Electroluminescent Perovskite Heterojunctions

*Sang-Hyun Chin, Lorenzo Mardegan, Francisco Palazon, Michele Sessolo\*, and Henk J. Bolink\**

Instituto de Ciencia Molecular (ICMol), Universidad de Valencia, C/ Catedrático J. Beltrán 2,  
46980 Paterna, Spain

## AUTHOR INFORMATION

### Corresponding Authors

Michele Sessolo, Henk J. Bolink - Instituto de Ciencia Molecular (ICMol), Universidad de  
Valencia, C/ Catedrático J. Beltrán 2, 46980 Paterna, Spain; [orcid.org/0000-0001-9784-6253](https://orcid.org/0000-0001-9784-6253);

E-mail: [michele.sessolo@uv.es](mailto:michele.sessolo@uv.es); [henk.bolink@uv.es](mailto:henk.bolink@uv.es).

Keywords: perovskites, heterojunctions, light-emitting diodes, light-emitting electrochemical  
cells, vacuum deposition, ion-diffusion

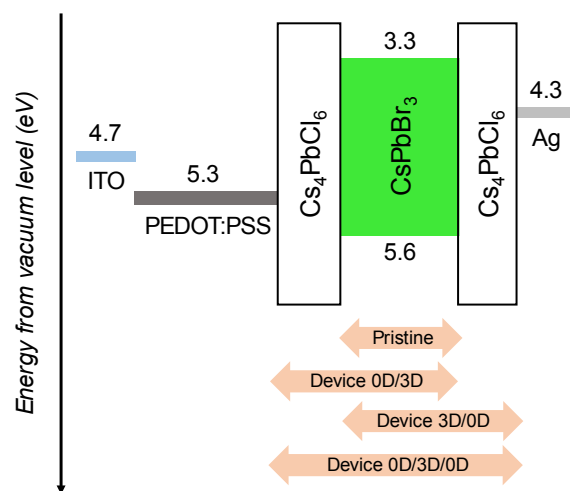

**Figure S1.** Schematic flat band energy diagram of the materials used in light-emitting devices based on Cs<sub>4</sub>PbCl<sub>6</sub>/CsPbBr<sub>3</sub> heterojunctions. Values for CsPbBr<sub>3</sub> are from the literature.<sup>[1]</sup> The reported IE for the iodide compound Cs<sub>4</sub>PbI<sub>6</sub> is 7.15 eV;<sup>[2]</sup> considering a downward shift of the valence band maximum (VBM) when exchanging I for Cl (due to increased electronegativity),<sup>[3]</sup> we expect the IE of Cs<sub>4</sub>PbCl<sub>6</sub> to be approximately 7.5 eV. Taking into account an optical bandgap of 4.4 eV, the electron affinity (EA) of Cs<sub>4</sub>PbCl<sub>6</sub> would be of about 3 eV.

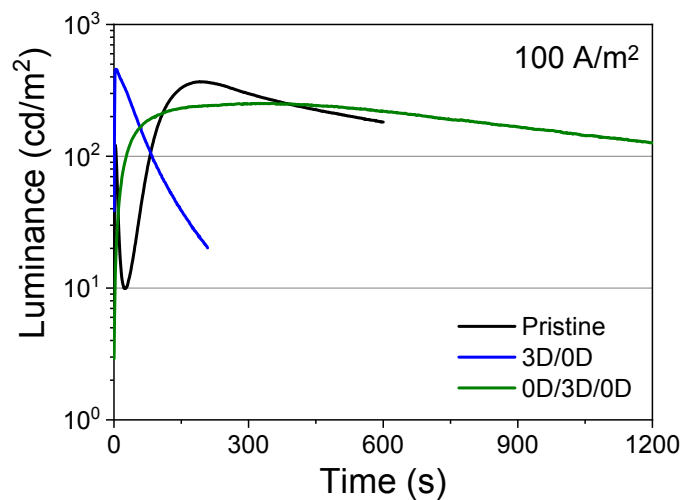

**Figure S2.** Constant current driving with CsPbBr<sub>3</sub> (Pristine), CsPbBr<sub>3</sub>/Cs<sub>4</sub>PbCl<sub>6</sub> (Device 3D/0D) Cs<sub>4</sub>PbCl<sub>6</sub>/CsPbBr<sub>3</sub>/Cs<sub>4</sub>PbCl<sub>6</sub> (Device 0D/3D/0D).

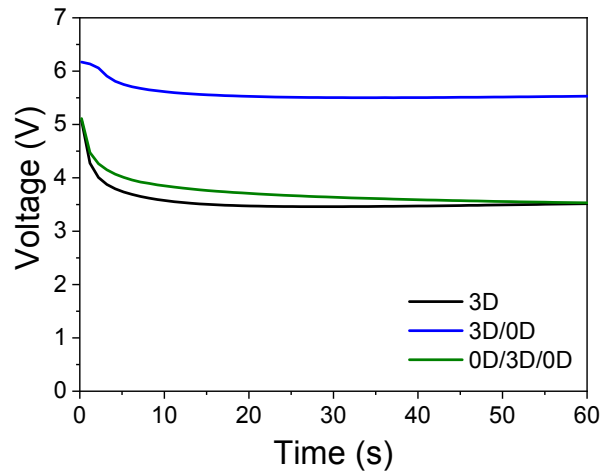

**Figure S3.** Zoom of the initial voltage decay upon application of a constant current of 100 A/m<sup>2</sup> to the light-emitting devices based on Cs<sub>4</sub>PbCl<sub>6</sub>/CsPbBr<sub>3</sub> heterojunction.

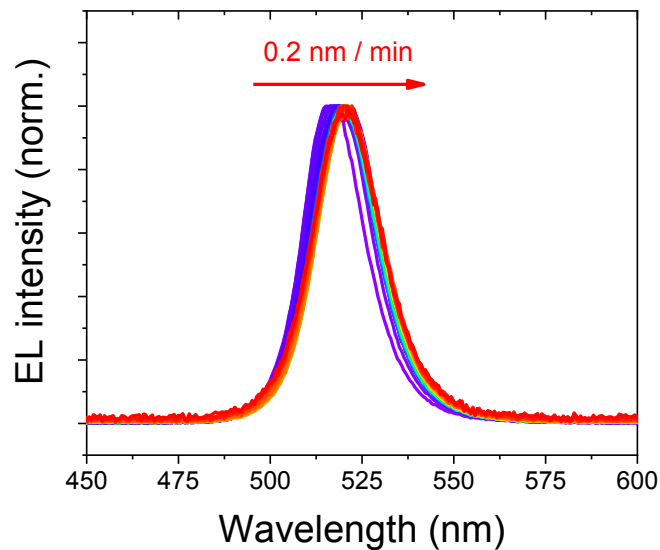

**Figure S4.** Electroluminescence spectra as a function of time while biasing 0D/3D/0D device ( $\text{Cs}_4\text{PbCl}_6/\text{CsPbBr}_3/\text{Cs}_4\text{PbCl}_6$ ) at  $100 \text{ A/m}^2$  for 20 minutes.

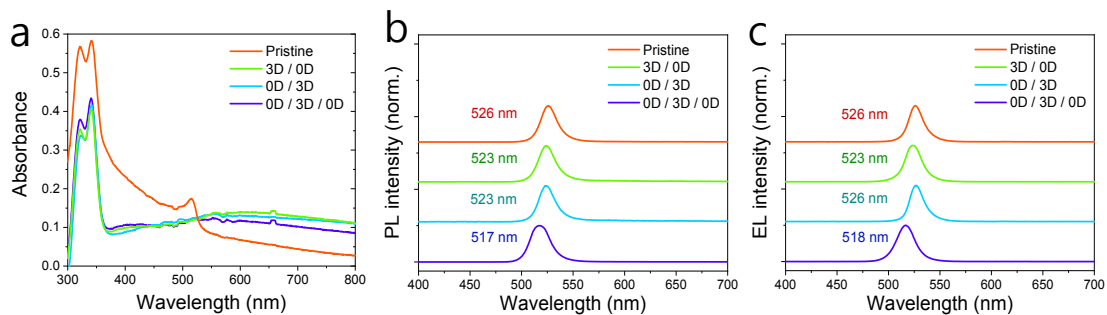

**Figure S5.** a) Optical absorption, b) photo- and c) electro-luminescence spectra from pristine  $\text{CsPbBr}_3$ :PEO (3D) films, 3D/0D, 0D/3D and 0D/3D/0D bi- and tri-layer perovskite heterojunctions.

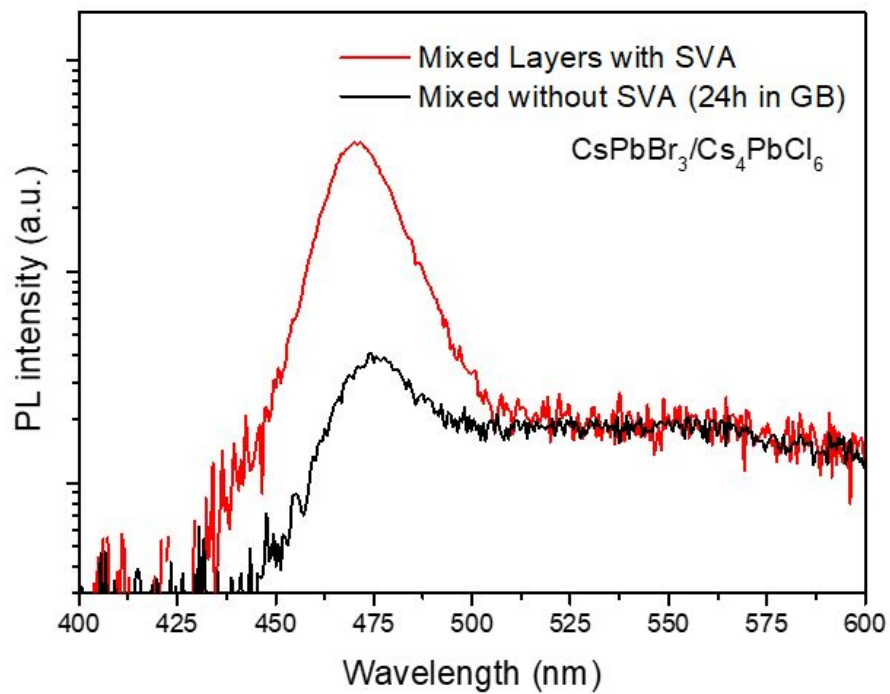

**Figure S6.** Photoluminescent spectra of intermixed  $\text{CsPbBr}_3/\text{Cs}_4\text{PbCl}_6$  with and without solvent vapor annealing (SVA).

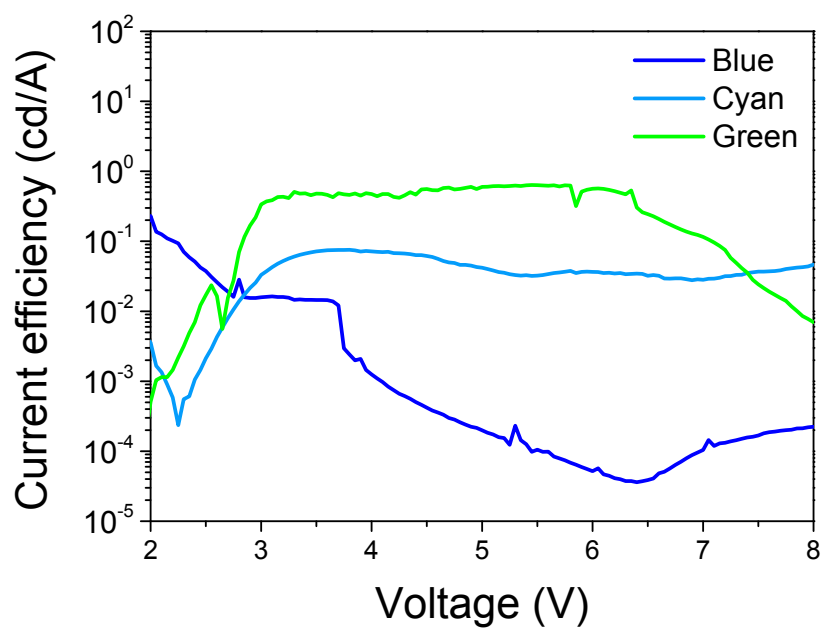

**Figure S7.** Current efficiency of CsPbBr<sub>3</sub> and Mixed CsPbBr<sub>3</sub>/Cs<sub>4</sub>PbCl<sub>6</sub>-based devices.

## References

- (1) J. Endres, M. Kulbak, L. Zhao, B. P. Rand, D. Cahen, G. Hodes, A. Kahn, *J. Appl. Phys.* **2017**, *121*, 035304.
- (2) J. Yin, J.-L. Brédas, O. M. Bakr, O. F. Mohammed, *Chem. Mater.* **2020**, *32*, 5036.
- (3) S. Tao, I. Schmidt, G. Brocks, J. Jiang, I. Tranca, K. Meerholz, S. Olthof, *Nat. Commun.* **2019**, *10*, 2560.
